# Supplementary material for: Inferring Host Gene Subnetworks Involved in Viral Replication
Source: PubMed Central journal article supplement (PMC4038467; doi:10.1371/journal.pcbi.1003626), 2014-05-29

FHV Hit Prediction:  
Comparison between objective functions (our work: IP)  
(cycles disallowed,  $\alpha=0.9$ )

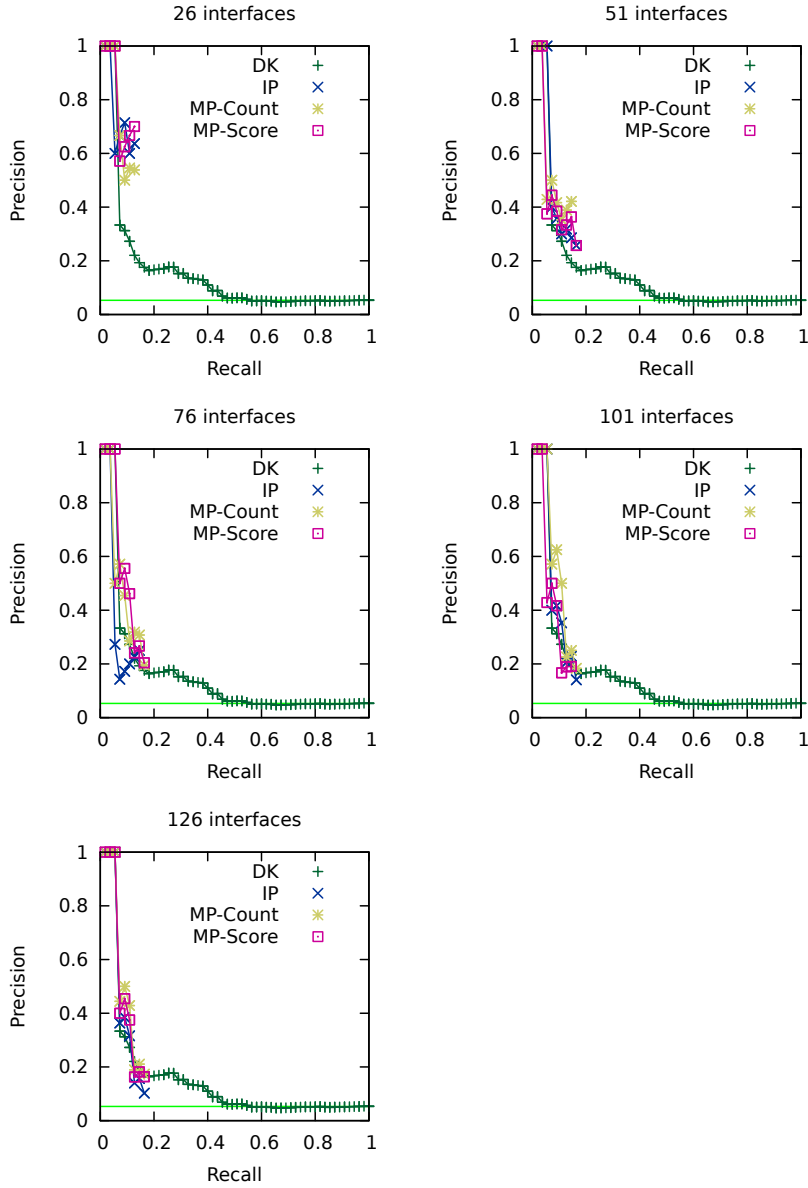

FHV Sign Prediction:  
Comparison between objective functions (our work: IP)  
(cycles disallowed,  $\alpha=0.9$ )

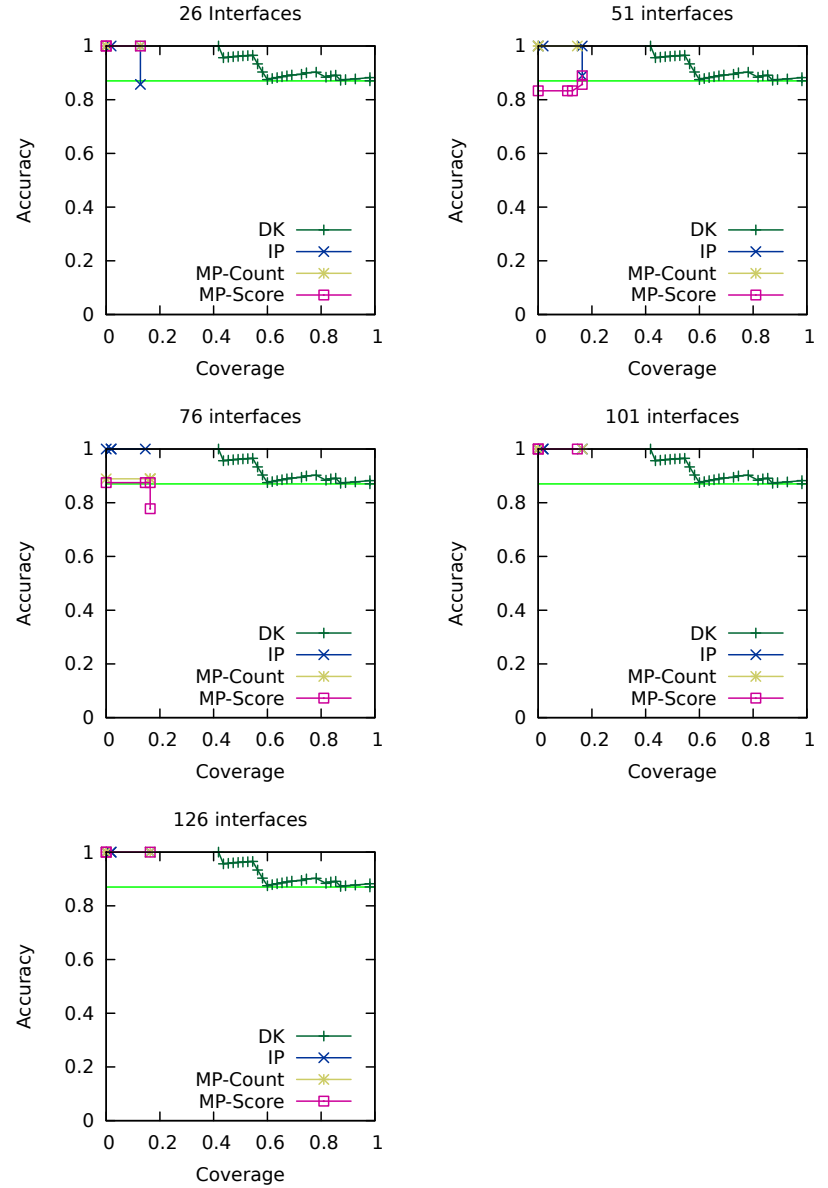

Supplement: pcbi.1003626.s002.pdf [file pcbi.1003626.s002.pdf]
