# Supplementary material for: Inferring Host Gene Subnetworks Involved in Viral Replication
Source: PubMed Central journal article supplement (PMC4038467; doi:10.1371/journal.pcbi.1003626), 2014-05-29

FHV Hit Prediction:  
IP with  $\alpha=0.9$  (our work) vs. IP with SPINE heuristic  
(cycles disallowed)

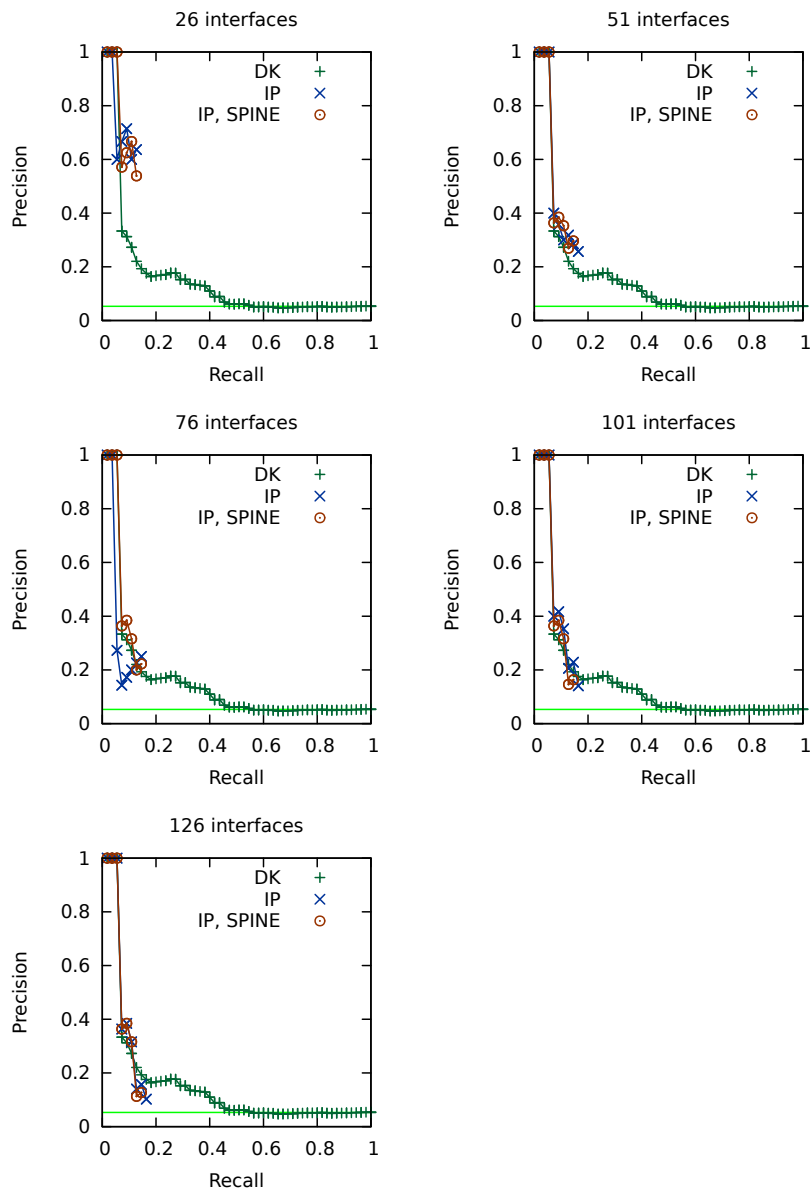

FHV Sign Prediction:  
IP with  $\alpha=0.9$  (our work) vs. IP with SPINE heuristic  
(cycles disallowed)

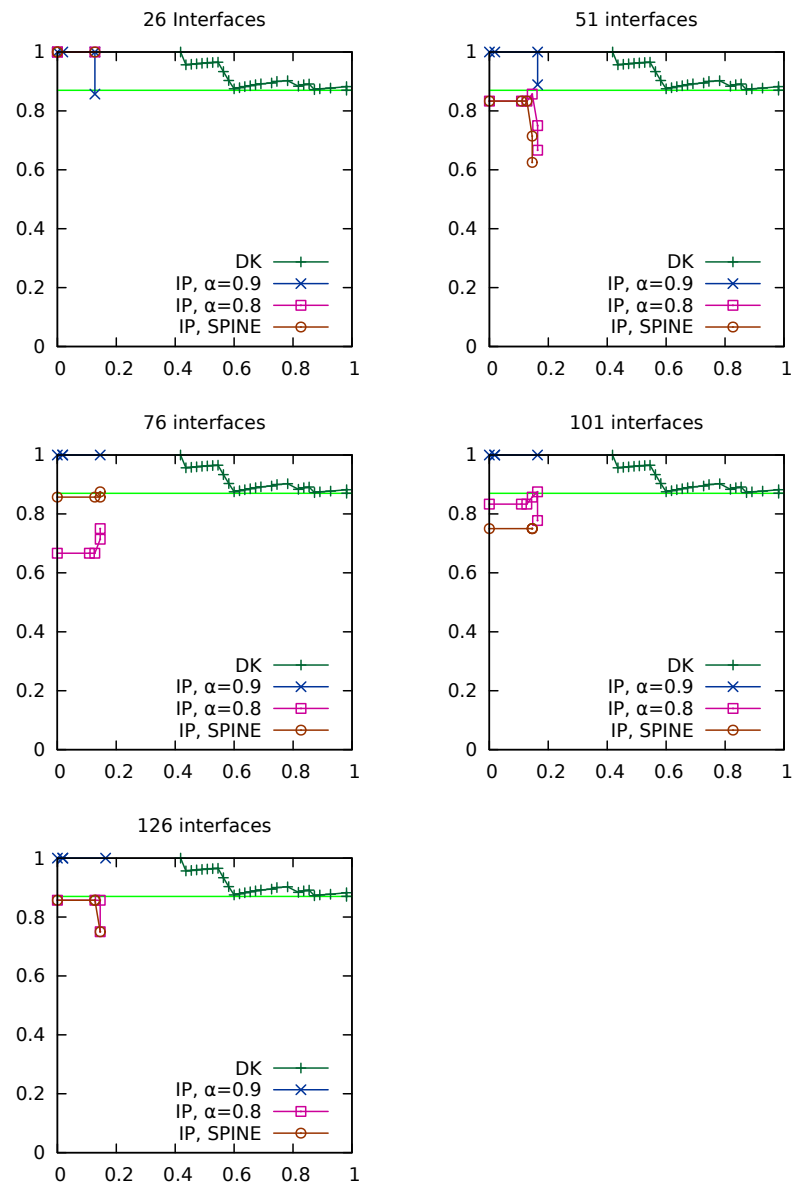

Supplement: pcbi.1003626.s004.pdf [file pcbi.1003626.s004.pdf]
