# Supplementary material for: Inferring Host Gene Subnetworks Involved in Viral Replication
Source: PubMed Central journal article supplement (PMC4038467; doi:10.1371/journal.pcbi.1003626), 2014-05-29

BMV Hit Prediction:  
Varying  $\alpha$   
(using literature interactions, cycles disallowed)

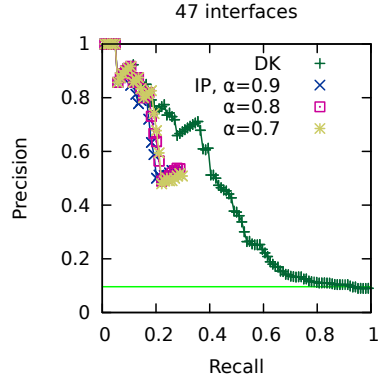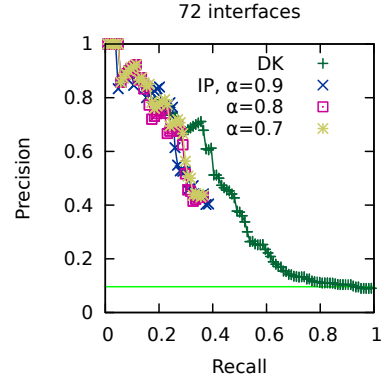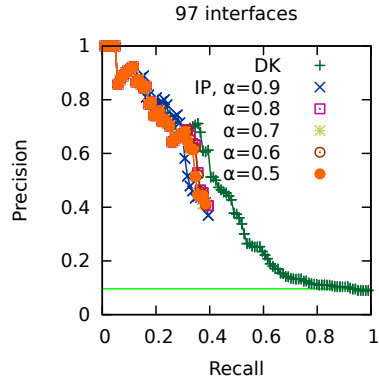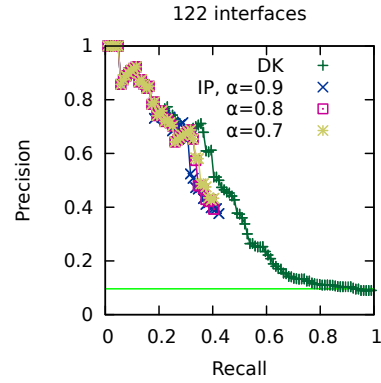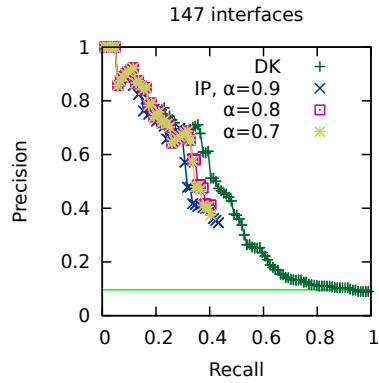

BMV Sign Prediction:  
Varying  $\alpha$ , the proportion of activating edges  
(using literature interactions, cycles disallowed)

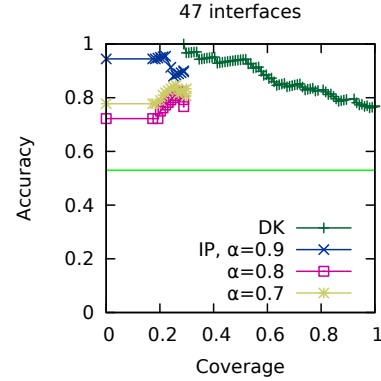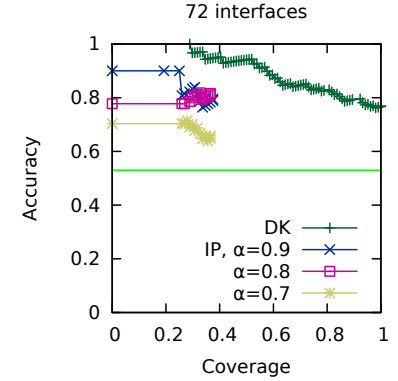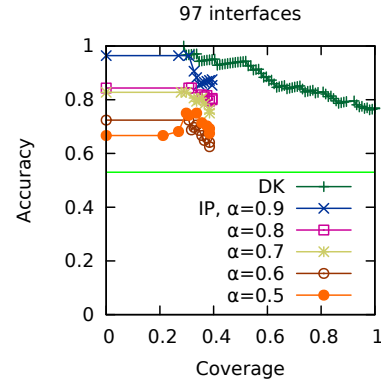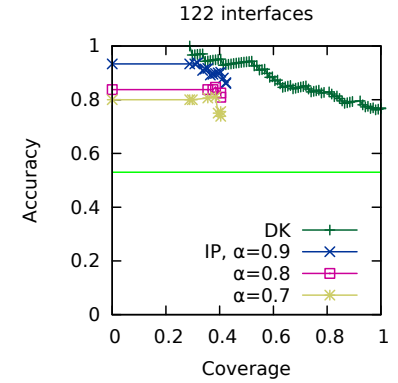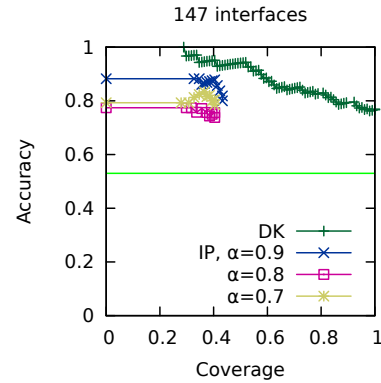

Supplement: pcbi.1003626.s005.pdf [file pcbi.1003626.s005.pdf]
