# Supplementary material for: Inferring Host Gene Subnetworks Involved in Viral Replication
Source: PubMed Central journal article supplement (PMC4038467; doi:10.1371/journal.pcbi.1003626), 2014-05-29

FHV Hit Prediction:  
Varying  $\alpha$   
(cycles disallowed)

FHV Sign Prediction:  
Varying  $\alpha$ , the proportion of activating edges  
(cycles disallowed)

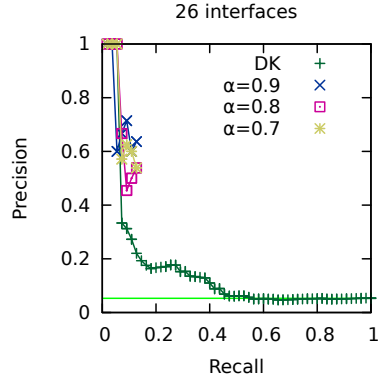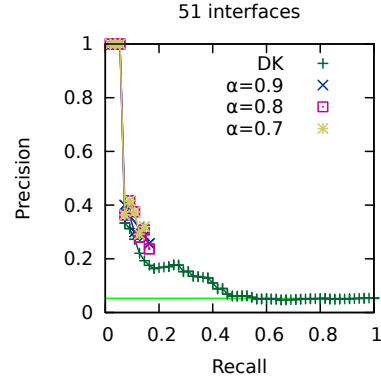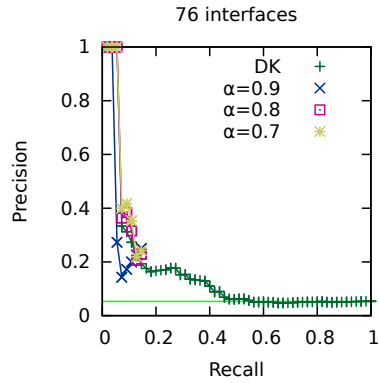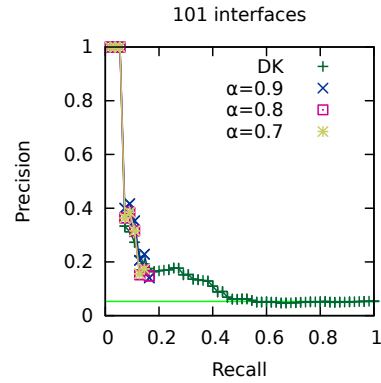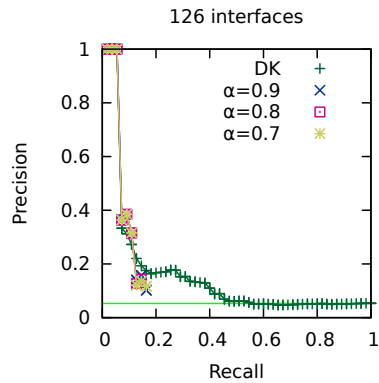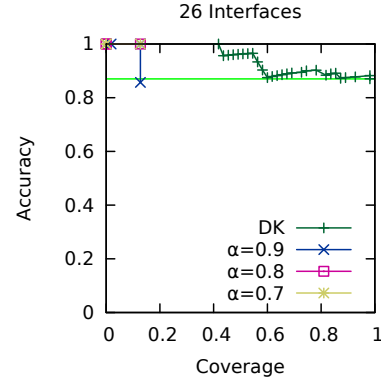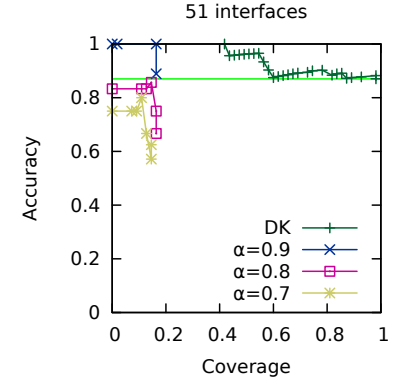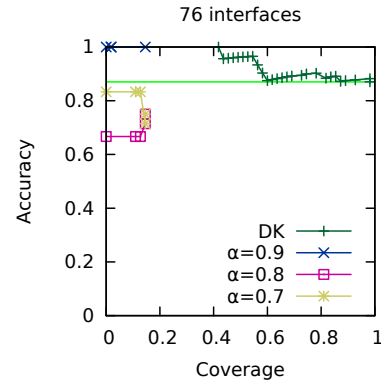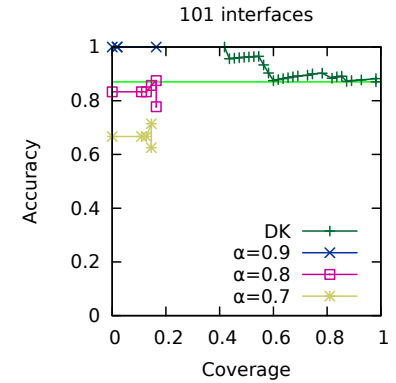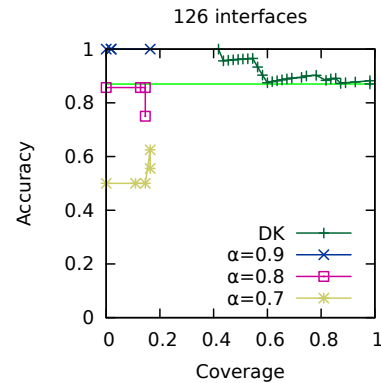

Supplement: pcbi.1003626.s006.pdf [file pcbi.1003626.s006.pdf]
