# Supplementary material for: Inferring Host Gene Subnetworks Involved in Viral Replication
Source: PubMed Central journal article supplement (PMC4038467; doi:10.1371/journal.pcbi.1003626), 2014-05-29

BMV Hit Prediction:  
Allowing or disallowing cycles ( $\alpha=0.9$ , using literature interactions)

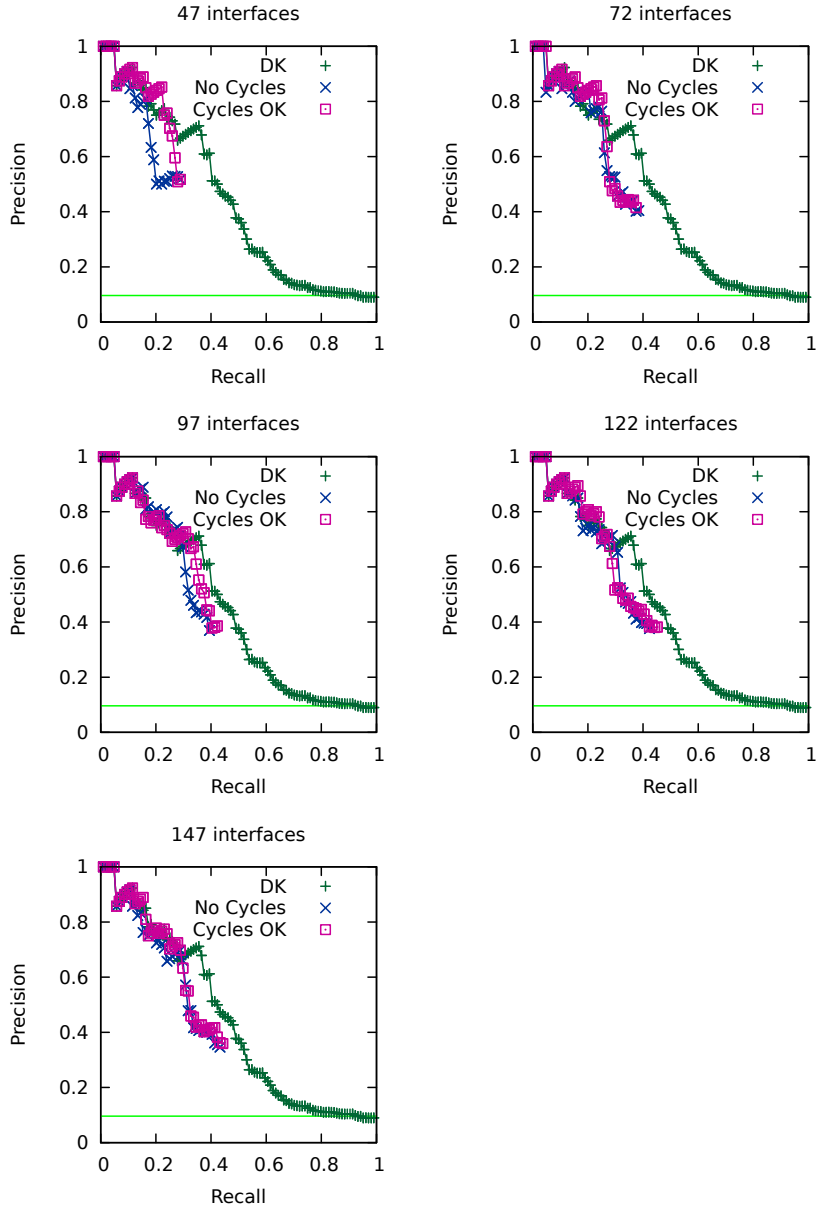

BMV Sign Prediction:  
Allowing or disallowing cycles ( $\alpha=0.9$ , using literature interactions)

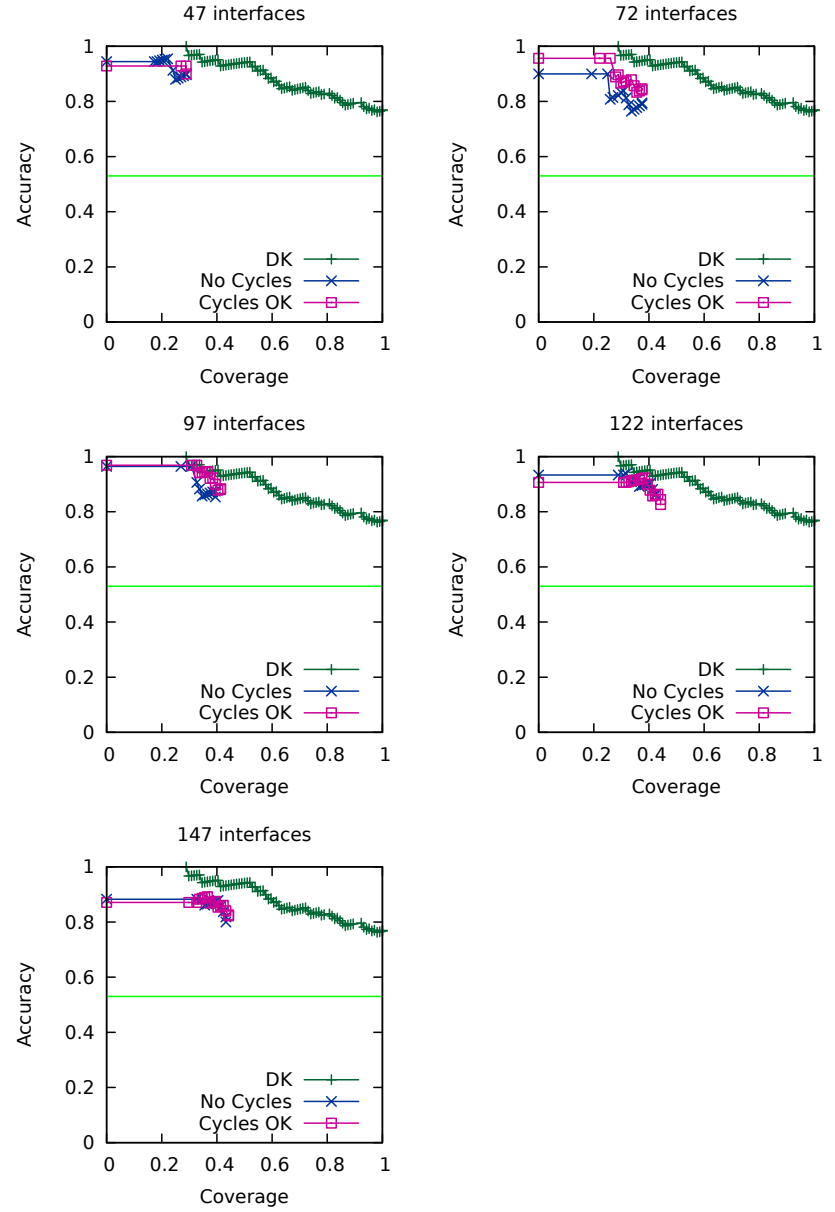

Supplement: pcbi.1003626.s007.pdf [file pcbi.1003626.s007.pdf]
