# Supplementary material for: Inferring Host Gene Subnetworks Involved in Viral Replication
Source: PubMed Central journal article supplement (PMC4038467; doi:10.1371/journal.pcbi.1003626), 2014-05-29
Supplement: pcbi.1003626.s010.pdf [file pcbi.1003626.s010.pdf]

Table S1: **Stability of leave-one-out inferred subnetworks**

| Data set | $\gamma$ | Node relevance | Node phenotype signs | Interface predictions | Interface relevance |
|----------|----------|----------------|----------------------|-----------------------|---------------------|
| BMV      | 47       | 0.853          | 0.843                | 0.765                 | 0.878               |
|          | 72       | 0.909          | 0.796                | 0.734                 | 0.907               |
|          | 97       | 0.92           | 0.803                | 0.712                 | 0.896               |
|          | 122      | 0.928          | 0.814                | 0.761                 | 0.897               |
|          | 147      | 0.928          | 0.835                | 0.776                 | 0.898               |
| FHV      | 26       | 0.817          | 0.796                | 0.716                 | 0.790               |
|          | 51       | 0.891          | 0.742                | 0.742                 | 0.867               |
|          | 76       | 0.941          | 0.747                | 0.82                  | 0.910               |
|          | 101      | 0.856          | 0.795                | 0.696                 | 0.788               |
|          | 126      | 0.889          | 0.728                | 0.768                 | 0.847               |

Stability of leave-one-out ensembles relative to ensembles inferred using all data. For both data sets, we show the stability of four types of predictions across each setting of  $\gamma$ .
