# Supplementary material for: Inferring Host Gene Subnetworks Involved in Viral Replication
Source: PubMed Central journal article supplement (PMC4038467; doi:10.1371/journal.pcbi.1003626), 2014-05-29
Supplement: pcbi.1003626.s011.pdf [file pcbi.1003626.s011.pdf]

Table S2: **Sizes of inferred subnetworks**

| Data set | $\gamma$ | Relevant weak | Relevant unassayed |
|----------|----------|---------------|--------------------|
| BMV      | 47       | 44.32         | 112.13             |
|          | 72       | 79.96         | 179.96             |
|          | 97       | 107.36        | 203.56             |
|          | 122      | 125.34        | 219.81             |
|          | 147      | 141.50        | 235.18             |
| FHV      | 26       | 20.91         | 50.10              |
|          | 51       | 48.62         | 100.05             |
|          | 76       | 65.84         | 129.79             |
|          | 101      | 80.19         | 148.86             |
|          | 126      | 93.68         | 171.00             |

Average number of predicted relevant weak-phenotype and unassayed genes in the leave-one-out inferred subnetworks.
