# Supplementary material for: Inferring Host Gene Subnetworks Involved in Viral Replication
Source: PubMed Central journal article supplement (PMC4038467; doi:10.1371/journal.pcbi.1003626), 2014-05-29
Supplement: pcbi.1003626.s012.pdf [file pcbi.1003626.s012.pdf]

Table S3: **Enriched, predicted relevant, protein complexes.**

| Complex name                                               | Size | Hits | Predicted hits | Permuted subnetworks $p$ -value | Random predictions $p$ -value |
|------------------------------------------------------------|------|------|----------------|---------------------------------|-------------------------------|
| 19/22S regulator                                           | 22   | 3    | 16             | < 0.001 *                       | < 0.001 *                     |
| Mediator                                                   | 25   | 2    | 11             | 0.243                           | < 0.001 *                     |
| 20S proteasome                                             | 14   | 2    | 10             | 0.007 *                         | < 0.001 *                     |
| Nsp1p complex                                              | 4    | 1    | 3              | 0.02 *                          | 0.017 *                       |
| nuclear ubiquitin ligase complex                           | 4    | 1    | 3              | 0.04 *                          | 0.021 *                       |
| UTP B complex                                              | 6    | 1    | 3              | 0.093                           | 0.006 *                       |
| THO complex                                                | 4    | 2    | 2              | 0.014 *                         | 0.029 *                       |
| karyopherin docking subcomplex of the Nuclear Pore Complex | 3    | 1    | 2              | 0.048 *                         | 0.014 *                       |
| Mot1p complex                                              | 2    | 0    | 2              | 0.039 *                         | 0.066                         |
| Decapping Enzyme Complex                                   | 2    | 0    | 2              | 0.118                           | 0.018 *                       |
| Elongator complex                                          | 6    | 5    | 1              | 0.004 *                         | 0.176                         |
| Set3p complex                                              | 7    | 3    | 1              | < 0.001 *                       | 0.378                         |
| UDP-N-acetylglucosamine transferase complex                | 2    | 1    | 1              | 0.036 *                         | 0.057                         |
| Bub1p/Bub3p complex                                        | 2    | 1    | 1              | 0.036 *                         | 0.107                         |
| DSIF complex                                               | 2    | 1    | 1              | 0.048 *                         | 0.215                         |
| Lge1p/Bre1p complex                                        | 2    | 1    | 1              | 0.002 *                         | 0.034 *                       |
| Prs1p/Prs3p                                                | 2    | 1    | 1              | 0.05                            | 0.045 *                       |
| OCA complex                                                | 6    | 6    | 0              | < 0.001 *                       | –                             |
| Ski Complex                                                | 3    | 3    | 0              | 0.014 *                         | –                             |
| Nem1p/Spo7p complex                                        | 2    | 2    | 0              | < 0.001 *                       | –                             |

Complexes in this table received a  $p$ -value of < 0.05 (indicated with \*) in either the test based on inferring permuted subnetworks (“Permuted subnetworks”), or the test based on drawing random predicted hits (“Random predictions”). Complexes are listed in decreasing order of the number of predicted hits. The final three rows list complexes that are entirely composed of experimental hits.
