# Supplementary material for: Inferring Host Gene Subnetworks Involved in Viral Replication
Source: PubMed Central journal article supplement (PMC4038467; doi:10.1371/journal.pcbi.1003626), 2014-05-29
Supplement: pcbi.1003626.s013.pdf [file pcbi.1003626.s013.pdf]

Table S4: **Interfaces accounted for by enriched complexes.**

| Complex name                                     | Interface | Size | Hits | Predicted hits | Permuted subnetworks $p$ -value | Random predictions $p$ -value |
|--------------------------------------------------|-----------|------|------|----------------|---------------------------------|-------------------------------|
| 19/22S regulator                                 |           | 22   | 3    | 14             | 0.002 *                         | < 0.001 *                     |
| SCF-Cdc4 complex                                 | Cdc34p    | 5    | 1    | 3              | 0.015 *                         | 0.017 *                       |
| Ada2p/Gcn5p/Ada3 transcription activator complex | Gcn5p     | 5    | 0    | 3              | 0.027 *                         | 0.051                         |
| Tup1p/Ssn6p complex                              | Tup1p     | 2    | 0    | 2              | 0.05                            | 0.049 *                       |
| Set3p complex                                    |           | 7    | 3    | 1              | < 0.001 *                       | 0.174                         |
| UDP-N-acetylglucosamine transferase complex      |           | 2    | 1    | 1              | 0.029 *                         | 0.034 *                       |
| Nem1p/Spo7p complex                              |           | 2    | 2    | 0              | < 0.001 *                       | –                             |
| OCA complex                                      |           | 6    | 6    | 0              | < 0.001 *                       | –                             |
| Ski Complex                                      |           | 3    | 3    | 0              | 0.009 *                         | –                             |

Significantly enriched complexes that account for predicted interfaces. If the complex contains an interface and is not a predicted interface itself, the protein name of the predicted interface is listed in the “Interface” column. The final three rows list complexes that are entirely composed of hits.
